# Supplementary material for: Friend leukemia integration 1 overexpression decreases endometrial receptivity and induces embryo implantation failure by promoting PART1 transcription in the endometrial epithelial cells
Source: PeerJ journal article supplement (doi:10.7717/peerj.16105), 2023-09-26
Supplement: uncropped_WB_blots.pdf [file uncropped_WB_blots.pdf]

Figure 2D

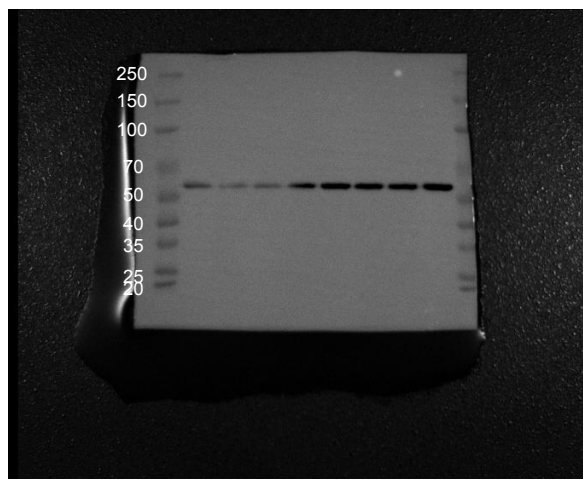

FLI1

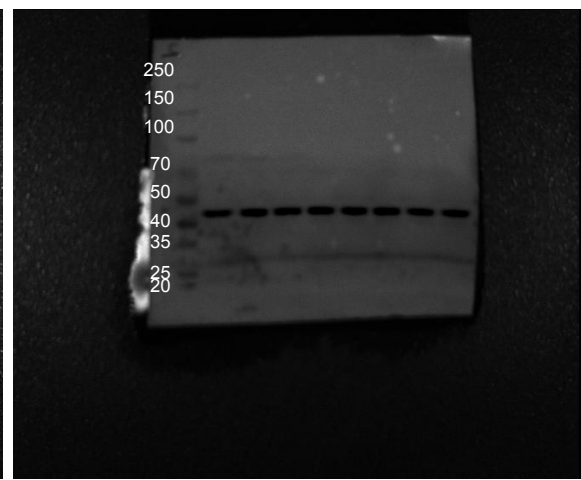

$\beta$ -actin

Figure 3C

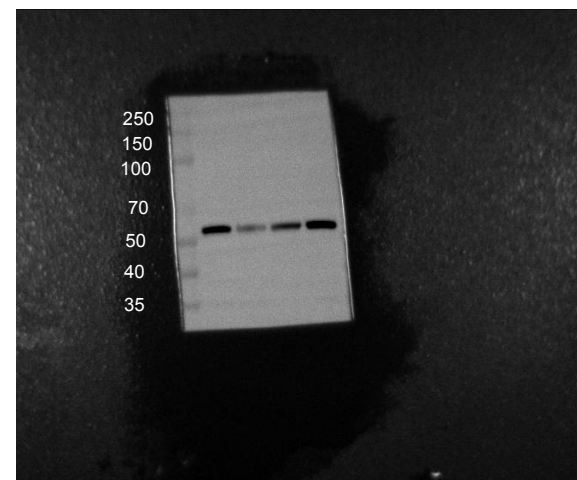

FLI1

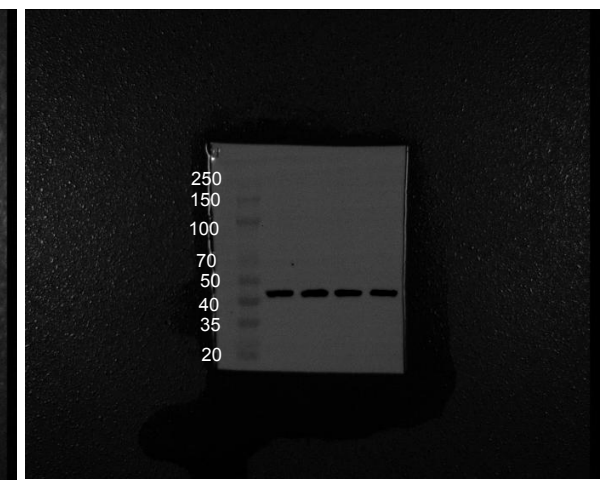

$\beta$ -actin

Figure 3G

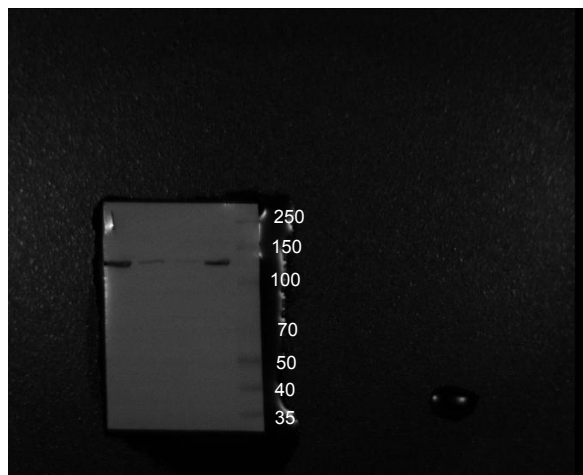

E-Cadherin

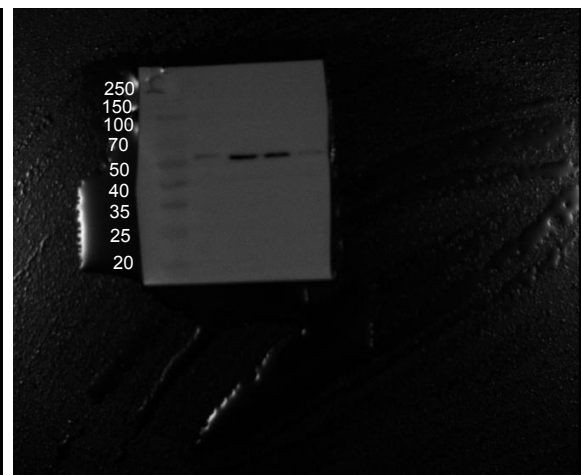

Vimentin

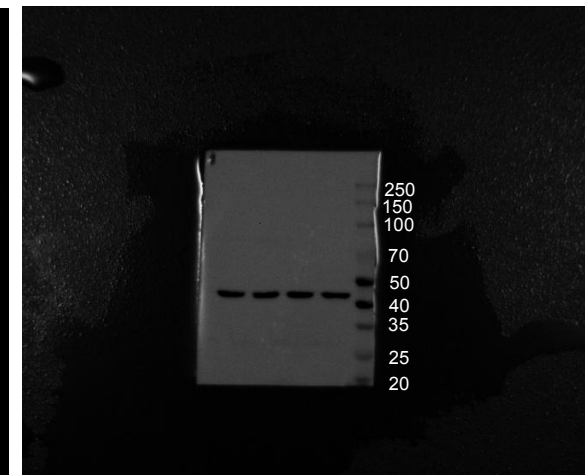

$\beta$ -actin

Figure 4B

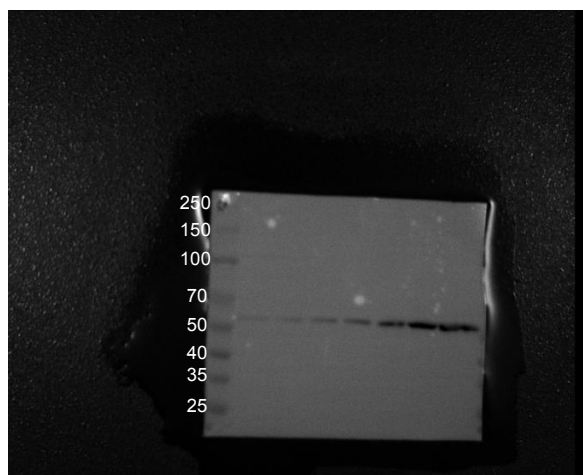

FLI1

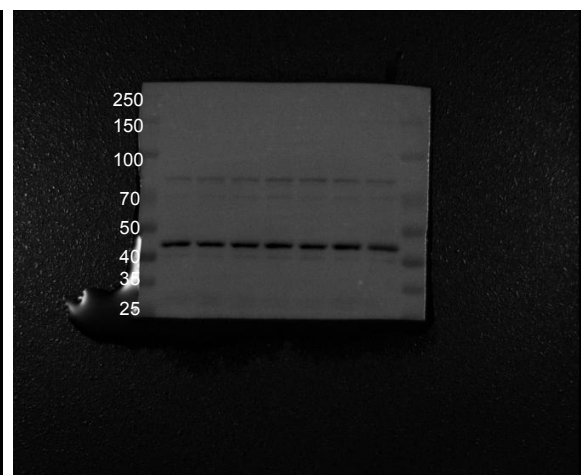

$\beta$ -actin

Figure 6D

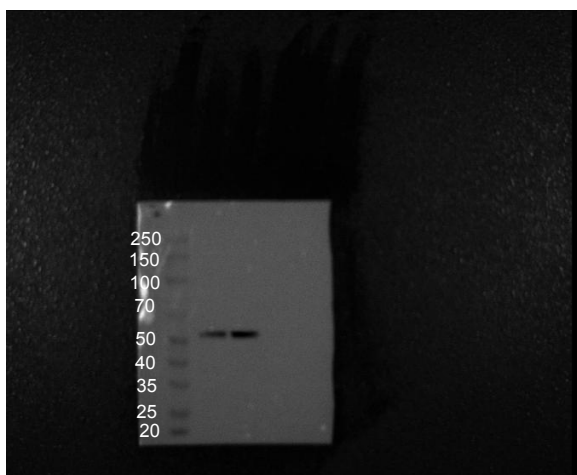

FLI1

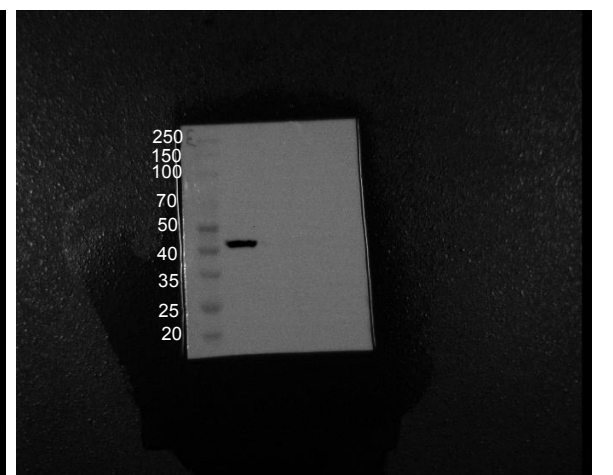

$\beta$ -actin

Figure 7D

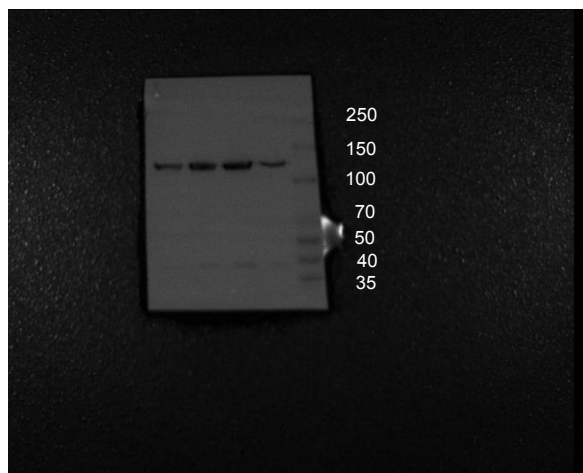

E-Cadherin

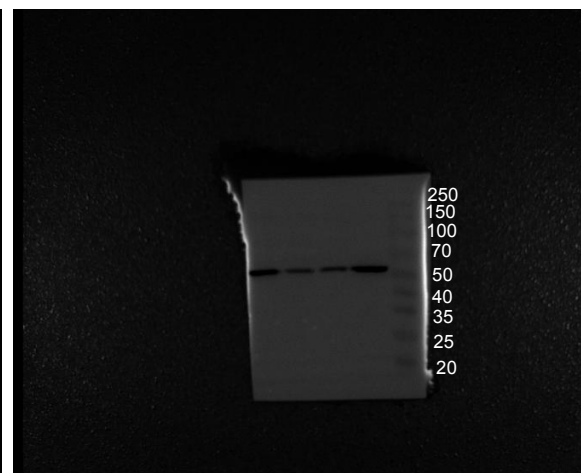

Vimentin

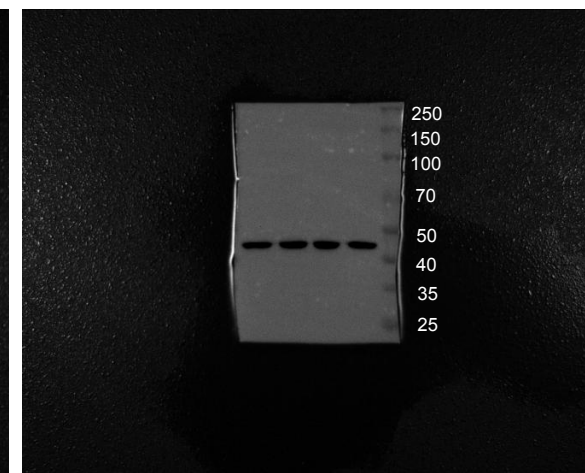

$\beta$ -actin
